# Supplementary material for: Polyoxoniobate-based 3D framework materials with photocatalytic hydrogen evolution activity
Source: Royal Society of Chemistry journal article supplement (doi:10.1039/c3cc49245a), 2014-01-01
Supplement: c3cc49245a1.pdf [file c3cc49245a1.pdf]

## Supporting Information

### **Polyoxoniobate-Based 3D Framework Materials with Photocatalytic Hydrogen Evolution Activity**

Jian-Qiang Shen,<sup>a</sup> Ying Zhang,<sup>a</sup> Zhi-Ming Zhang,<sup>\*a</sup> Yang-Guang Li,<sup>\*a</sup> Yan-Qing Gao<sup>a</sup> and En-Bo Wang<sup>\*a</sup>

*<sup>a</sup>Key laboratory of Polyoxometalate Science of Ministry of Education, Department of Chemistry, Northeast Normal University, Renmin Street No.5268, Changchun, Jilin, 130024, P. R. China;*

*E-mail: zhangzm178@nenu.edu.cn (Z. M. Zhang), wangeb889@nenu.edu.cn (E. B. Wang).*

### **CONTENTS**

|                  |                                                 |
|------------------|-------------------------------------------------|
| <b>Section 1</b> | <b>Experimental Section</b>                     |
| <b>Section 2</b> | <b>Supplementary Structural Section</b>         |
| <b>Section 3</b> | <b>Supplementary Physical Characterizations</b> |

## ***Section 1 Experimental Section***

**Materials and general methods.** All chemicals were commercially purchased and used without further purification.  $\text{K}_7\text{HNb}_6\text{O}_{19}\cdot 13\text{H}_2\text{O}$  was prepared according to the literature and identified by IR spectra.<sup>4c</sup> Elemental analysis for Nb, V, P and Cu were determined by a Leaman inductively coupled plasma (ICP) spectrometer. IR spectra were recorded in the range 400-4000  $\text{cm}^{-1}$  on an Alpha Centaur FT/IR Spectrophotometer using KBr pellets. Solid state UV-vis absorption spectra were recorded from 200 to 900 nm using barium sulfate ( $\text{BaSO}_4$ ) as a standard with 100% reflectance on a Varian Cary 500 UV-Vis spectrophotometer. Emission/excitation spectra were recorded on a HITACHI F-7000 fluorescence spectrophotometer. Powder X-ray diffraction measurement was recorded at room temperature on a Siemens D5005 diffractometer with  $\text{Cu-K}\alpha$  ( $\lambda = 1.5418 \text{ \AA}$ ). Thermogravimetric analysis (TGA) of the samples were performed using a Perkin-Elmer TG-7 analyzer heated from 55  $^\circ\text{C}$  to 900  $^\circ\text{C}$  under nitrogen at the heating rate of 10  $^\circ\text{C}\cdot\text{min}^{-1}$ .

**Synthesis of 1.**  $\text{Cu}(\text{Ac})_2\cdot 2\text{H}_2\text{O}$  (0.044 g, 0.200 mmol) was added to 2 mL distilled water with stirring. Then the resulting blue solution was added dropwise to a 4 mL aqueous solution containing  $\text{K}_7\text{HNb}_6\text{O}_{19}\cdot 13\text{H}_2\text{O}$  (0.045 g, 0.033 mmol),  $\text{NaVO}_3$  (0.049 g, 0.400 mmol) and  $\text{H}_3\text{PO}_4$  (5 M, 0.030 mL, 0.150 mmol). The mixture was adjusted to pH 9.50 using 1 M NaOH solution. Subsequently, en was used to adjust the pH value of mixture to 10.50, and the mixture was transferred to a Teflon-lined stainless steel autoclave (23 mL). The Teflon-lined stainless steel autoclave was heated at 160  $^\circ\text{C}$  for 72 h, and was then cooled to room temperature at a rate of 10  $^\circ\text{C}/\text{h}$ . Brown block-like crystals of **1** were obtained from the solid product in a yield of 39.8% (based on Nb). Anal. For **1**: Calcd (%): P 0.98, Cu 8.08, V 9.71, Nb 35.43. Found (%): P 1.05, Cu 8.22, V 9.46, Nb 35.27. **Synthesis of 2.** **2** was prepared according to the similar method of **1**, except enMe was used instead of en. After

cooling to room temperature, brown block-like crystals were collected. Yield: ca. 58.3% (based on Nb). Anal. For **2**: Calcd (%): P 0.96, Cu 7.87, V 9.47, Nb 34.54. Found (%): P 1.02, Cu 8.06, V 9.21, Nb 34.69.

### **X-ray Crystallography**

The crystal data of **1** and **2** were collected on a Rigaku R-AXIS RAPID IP diffractometer (Mo $K_{\alpha}$ , graphite monochromator,  $\lambda = 0.71073 \text{ \AA}$ ). The structures were solved by the direct method and refined by the full-matrix least-squares method on  $F^2$  using the SHELXTL-97 crystallographic software package.<sup>S1</sup> During the refinement, all H atoms on water molecules were directly included in the molecular formula. Hydrogen atoms of organic ligands were fixed in the calculated positions. The crystal data and structure refinements of compounds **1** and **2** are summarized in Table S1. CCDC reference numbers are 973046 and 973047 for **1** and **2**, respectively. The data can be obtained free of charge from the Cambridge Crystallographic Data Centre via [www.ccdc.cam.ac.uk/datarequest/cif](http://www.ccdc.cam.ac.uk/datarequest/cif).

S1. G. M. Sheldrick, SHELXL97, Program for Crystal Structure Refinement, University of Göttingen: Göttingen, Germany, 1997; G. M. Sheldrick, SHELXS97, Program for Crystal Structure Solution, University of Göttingen: Göttingen, Germany, 1997.

## **Photocatalytic Experiments**

**The UV photocatalytic experiments with irradiation of 125 W Hg lamp.** The photocatalytic reactions were carried out in a Pyrex inner-irradiation-type reaction vessel with magnetic stirring at room temperature. The photocatalytic reactions were performed in 100 mL 20% CH<sub>3</sub>OH aqueous solution, containing 100 mg photocatalyst and loading 0.75% Pt. Before the photocatalytic reaction, nitrogen gas was bubbled through the reaction mixture for 0.5 h to remove air. The mixture was then irradiated using a 125 W Hg lamp, and the produced H<sub>2</sub> was analyzed using a GC 7890T instrument.

**The photocatalytic experiments with irradiation of 300 W Xe lamp.** This photocatalytic experiments were performed similar to the UV process, except a 300 W Xe lamp (without filter) was used instead of 125 W Hg lamp. Before the photocatalytic reaction, vacuum pump was bubbled through the reaction mixture for 0.5 h to remove air.

**Table 1** Crystal Data and Structure Refinement for **1 - 2**.

|                                          | <b>1</b>                                                                                                            | <b>2</b>                                                                                                            |
|------------------------------------------|---------------------------------------------------------------------------------------------------------------------|---------------------------------------------------------------------------------------------------------------------|
| Empirical formula                        | C <sub>16</sub> H <sub>80</sub> Cu <sub>4</sub> N <sub>16</sub> PV <sub>6</sub><br>Nb <sub>12</sub> O <sub>59</sub> | C <sub>24</sub> H <sub>97</sub> Cu <sub>4</sub> N <sub>16</sub> PV <sub>6</sub><br>Nb <sub>12</sub> O <sub>57</sub> |
| <i>M</i>                                 | 3146.65                                                                                                             | 3227.87                                                                                                             |
| $\lambda/\text{\AA}$                     | 0.71073                                                                                                             | 0.71073                                                                                                             |
| <i>T</i> /K                              | 293(2)                                                                                                              | 293(2)                                                                                                              |
| Crystal dimensions/mm                    | 0.25 × 0.17 × 0.15                                                                                                  | 0.24 × 0.18 × 0.16                                                                                                  |
| Crystal system                           | Tetragonal                                                                                                          | Tetragonal                                                                                                          |
| Space group                              | <i>I4/m</i>                                                                                                         | <i>I4/m</i>                                                                                                         |
| <i>a</i> /\AA                            | 15.141(2)                                                                                                           | 15.229(2)                                                                                                           |
| <i>b</i> /\AA                            | 15.141(2)                                                                                                           | 15.229(2)                                                                                                           |
| <i>c</i> /\AA                            | 19.257(4)                                                                                                           | 19.207(4)                                                                                                           |
| $\alpha$ /°                              | 90                                                                                                                  | 90                                                                                                                  |
| $\beta$ /°                               | 90                                                                                                                  | 90                                                                                                                  |
| $\gamma$ /°                              | 90                                                                                                                  | 90                                                                                                                  |
| <i>V</i> /\AA <sup>3</sup>               | 4414.7(12)                                                                                                          | 4454.5(12)                                                                                                          |
| <i>Z</i>                                 | 2                                                                                                                   | 2                                                                                                                   |
| <i>D<sub>c</sub></i> /Mg m <sup>-3</sup> | 2.367                                                                                                               | 2.407                                                                                                               |
| $\mu$ /mm <sup>-1</sup>                  | 3.151                                                                                                               | 3.125                                                                                                               |
| <i>F</i> (000)                           | 3042                                                                                                                | 3140                                                                                                                |
| $\theta$ Range/°                         | 3.19– 25.00                                                                                                         | 3.17 – 25.00                                                                                                        |
| Data/restraints/parameters               | 2014 / 0 / 137                                                                                                      | 2029 / 13 / 154                                                                                                     |
| $R_1(I > 2\sigma(I))^a$                  | 0.0649                                                                                                              | 0.0645                                                                                                              |
| $wR_2$ (all data) <sup>a</sup>           | 0.2145                                                                                                              | 0.2226                                                                                                              |
| Goodness-of-fit on <i>F</i> <sup>2</sup> | 1.002                                                                                                               | 1.038                                                                                                               |

<sup>a</sup> $R_1 = \sum||F_0| - |F_C|| / \sum|F_0|$ ;  $wR_2 = \sum[w(F_0^2 - F_C^2)^2] / \sum[w(F_0^2)^2]^{1/2}$

## Section 2 Supplementary Structural Section

### Bond valence sum calculations of compounds 1 and 2

Table S1. Bond valence sum calculations of compound 1.<sup>S2,S3</sup>

| Bonds                                | Bond length (Å) | BVS      | Bonds                                | Bond length (Å) | BVS      |
|--------------------------------------|-----------------|----------|--------------------------------------|-----------------|----------|
| V(1) - O(7)                          | 1.628(14)       | 1.526328 | V(2) - O(6)                          | 1.653(10)       | 1.426759 |
| V(1) - O(1) #2                       | 1.981(6)        | 0.587175 | V(2) - O(2)                          | 1.968(7)        | 0.608008 |
| V(1) - O(1)                          | 1.981(6)        | 0.587175 | V(2) - O(2)#1                        | 1.968(7)        | 0.608008 |
| V(1) - O(1) #1                       | 1.981(6)        | 0.587175 | V(2) - O(3)                          | 1.995(6)        | 0.565373 |
| V(1) - O(1)#6                        | 1.981(6)        | 0.587175 | V(2) - O(3) #1                       | 1.995(6)        | 0.565373 |
| <b><math>V_{V(1)} = 3.875</math></b> |                 |          | <b><math>V_{V(2)} = 3.774</math></b> |                 |          |

Table S2. Bond valence sum calculations of compound 2.<sup>S2,S3</sup>

| Bonds                                | Bond length (Å) | BVS      | Bonds                                | Bond length (Å) | BVS      |
|--------------------------------------|-----------------|----------|--------------------------------------|-----------------|----------|
| V(1) - O(1)                          | 1.604(13)       | 1.628659 | V(2) - O(2)                          | 1.632(11)       | 1.510038 |
| V(1) - O(3) #1                       | 1.978(6)        | 0.591955 | V(2) - O(4) #2                       | 1.969(7)        | 0.606367 |
| V(1) - O(3)#4                        | 1.978(6)        | 0.591955 | V(2) - O(4)                          | 1.969(7)        | 0.606367 |
| V(1) - O(3) #5                       | 1.978(6)        | 0.591955 | V(2) - O(5) #2                       | 1.993(6)        | 0.568437 |
| V(1) - O(3)                          | 1.978(6)        | 0.591955 | V(2) - O(5)                          | 1.993(6)        | 0.568437 |
| <b><math>V_{V(3)} = 3.996</math></b> |                 |          | <b><math>V_{V(4)} = 3.860</math></b> |                 |          |

S2. The valence sum calculations are performed on a program of bond valence calculator, version 2.00 February 1993, written by C. Hormillosa, with assistance from S. Healy, distributed by I. D. Brown.

S3 I. D. Brown, D. Altermatt, *Acta Crystallogr.* **1985**, *B41*, 244-247.

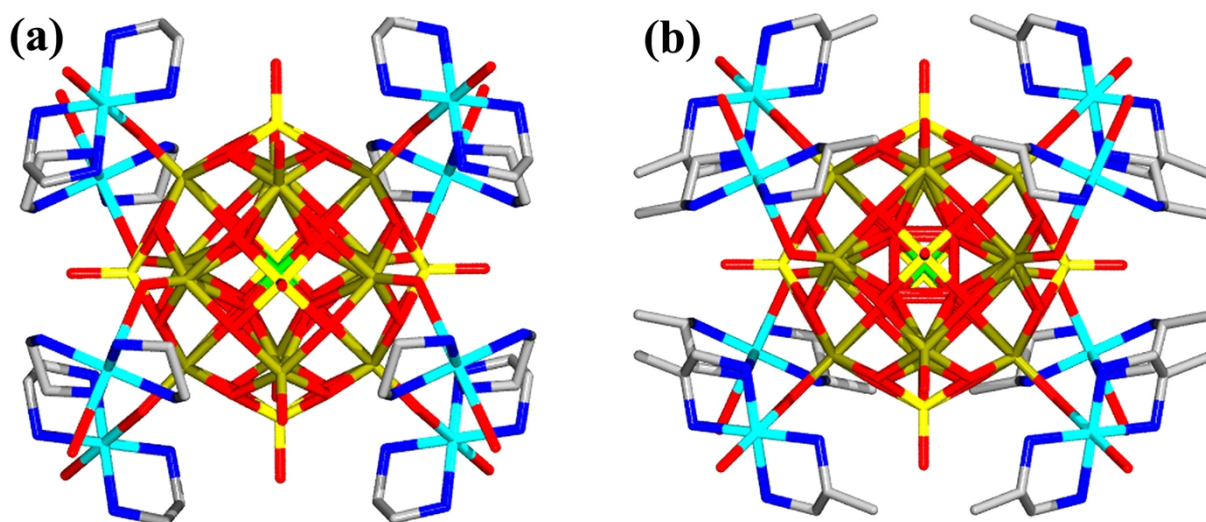

Fig. S1. The stick representation of compounds **1** (a) and **2** (b) decorated by the Cu-organic amine fragments; color codes: red spheres: O; yellow spheres: V; green spheres: P.

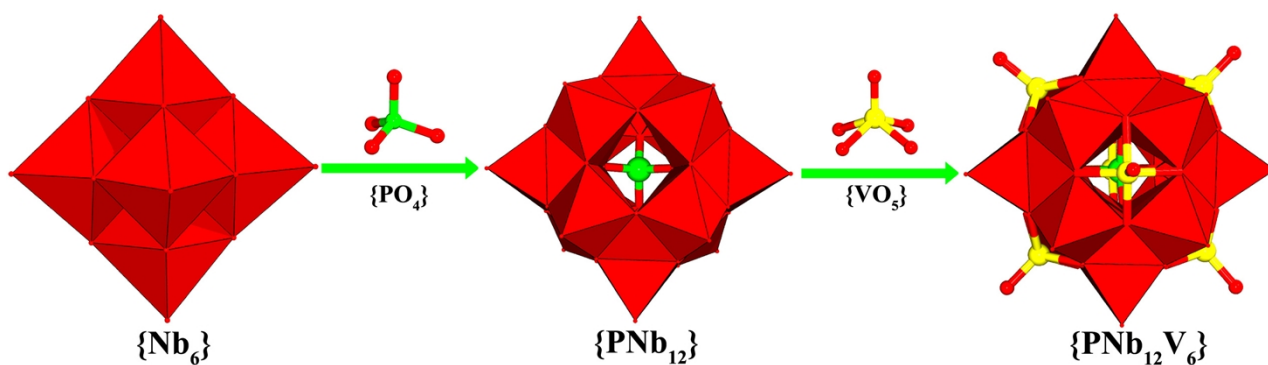

Fig. S2. Schematic presentations of possible mechanisms of the formation of  $\{\text{PNb}_{12}\text{O}_{40}(\text{VO})_6\}$  cluster.

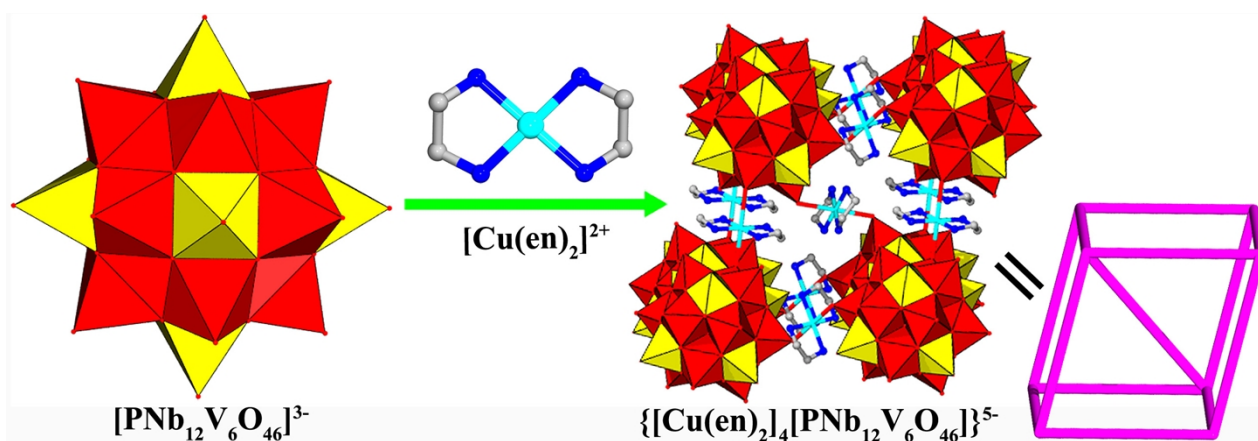

Fig. S3. Structural view and schematic view of a parallelepiped cage composed of eight

polyoxoanions.

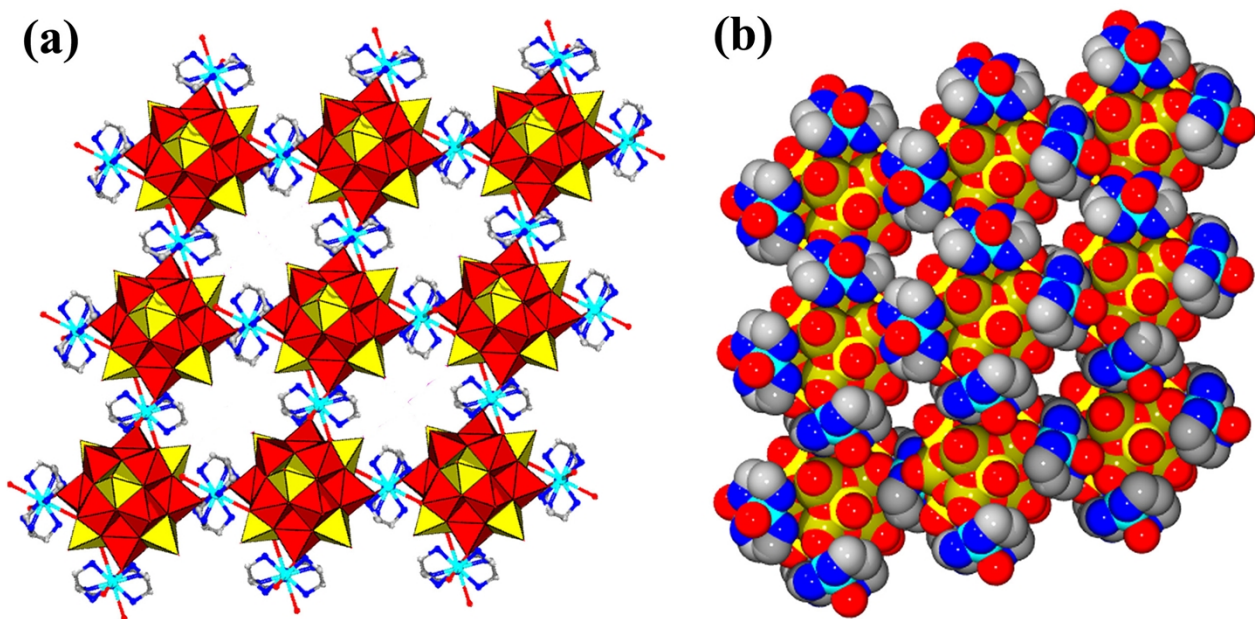

Fig. S4. View of the 3D porous framework of **1** along *a* and *b* directions.

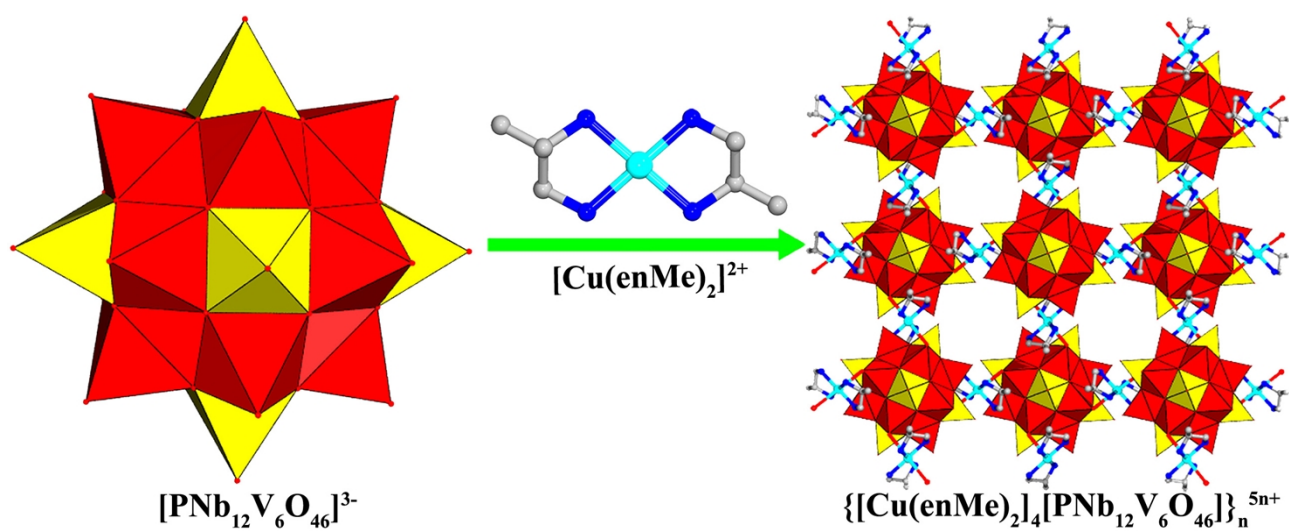

Fig. S5. Structural view of compound **2**.



**Section 3**      **Supplementary Physical Characterizations**

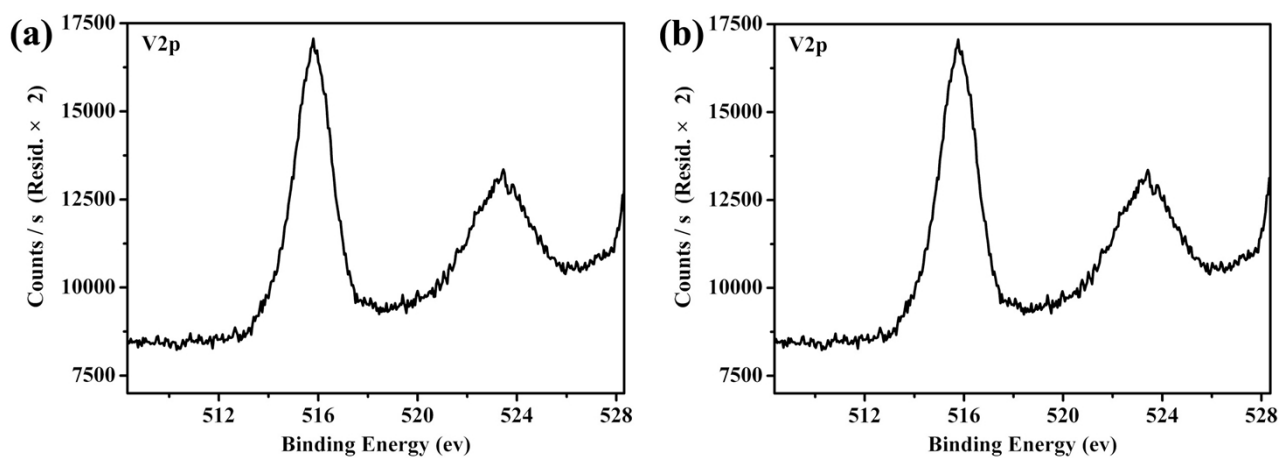

Fig. S6. The XPS spectra of **1** and **2** each give one peak at 515.76 eV for **1**, and 515.79 eV for **2**, which can be ascribed to  $V^{4+} 2p_{3/2}$ , respectively.<sup>11a</sup>

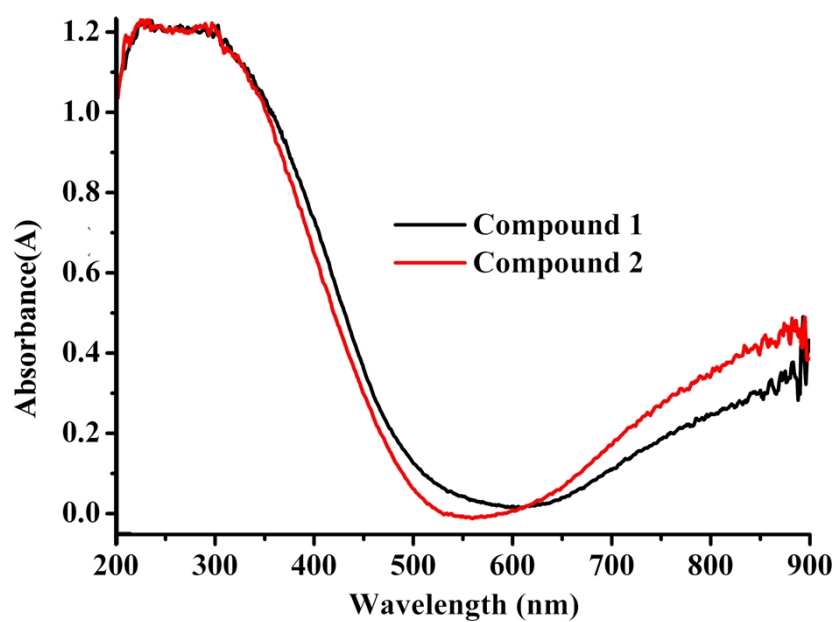

Fig. S7. The solid state UV/Vis absorption spectra of compound **1**(black) and **2** (red).

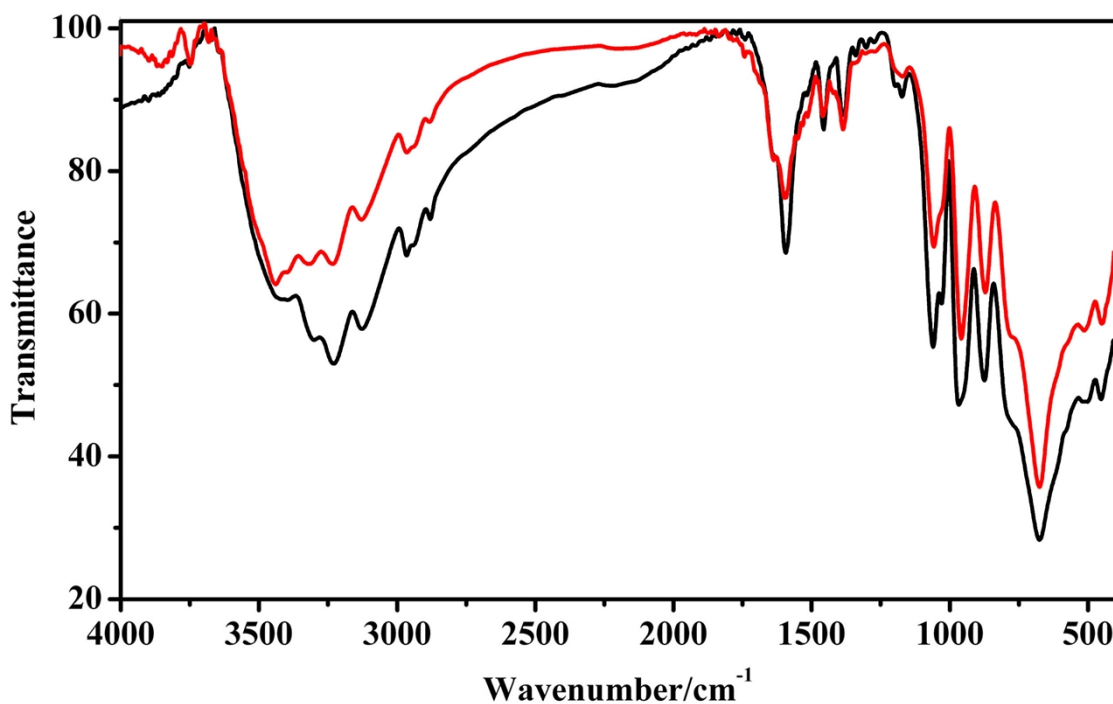

Fig. S8. The IR spectra of **1** (black) and **2**(red).

The IR spectra of **1** and **2** are recorded between 400 and 4000  $\text{cm}^{-1}$  with a KBr pellet, which could be used for identification of the characteristic vibration bands of PONs and organic components in products. In the IR spectra, the terminal  $\text{M} = \text{O}_t$  ( $\text{M} = \text{V}$ ,  $\text{Nb}$ ) vibrations appear at 961  $\text{cm}^{-1}$  and 874  $\text{cm}^{-1}$  for **1** and at 964 and 875  $\text{cm}^{-1}$  for **2**, respectively.<sup>10,11</sup> The characteristic peaks at 678 and 453  $\text{cm}^{-1}$  (**1**) and 675 and 452  $\text{cm}^{-1}$  (**2**) are attributed to the bridging  $\text{Nb}-\text{O}_b-\text{Nb}$  vibrations, respectively.<sup>4-6</sup> Bands at 1059  $\text{cm}^{-1}$  for **1** and 1060  $\text{cm}^{-1}$  for **2** are assigned to  $\text{P}-\text{O}_c$  vibration, respectively.<sup>S4</sup> Bands in the 1170–1598  $\text{cm}^{-1}$  (**1**) and 1172–1593  $\text{cm}^{-1}$  (**2**) region are attributed to the organic amine groups.<sup>10-13</sup>

S4 M. Nyman, A. J. Celestian, J. B. Parise, G. P. Holland and T. M. Alam, *Inorg. Chem.*, 2006, **45**, 1043.

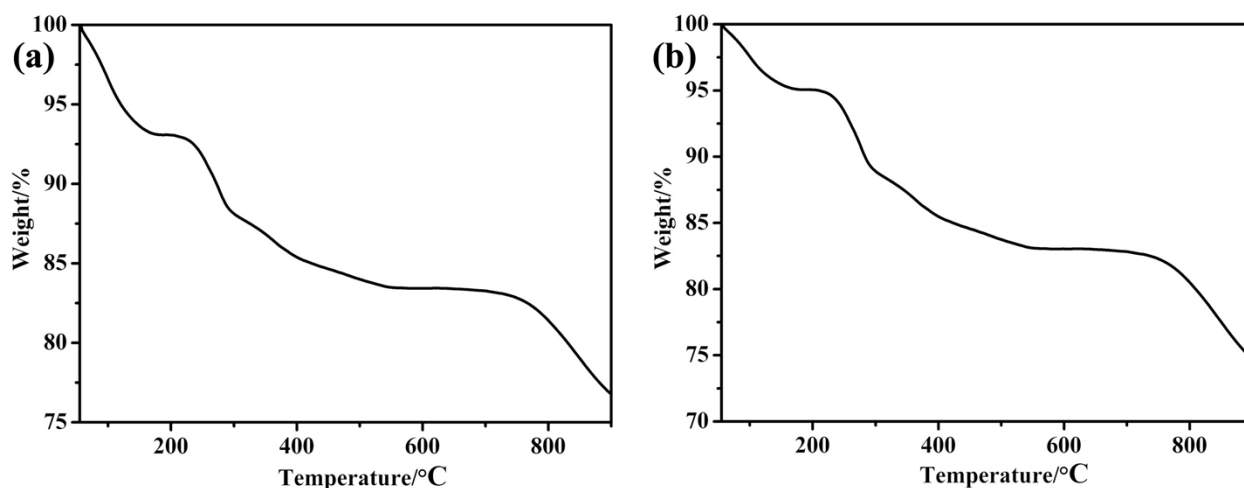

Fig. S9. The TGA curves of **1** and **2**.

To investigate the thermal stabilities of compounds **1** and **2**, thermogravimetric analyses (TGA) were carried out under a nitrogen atmosphere with a heating rate of 10 °C/min. Three continuous weight losses steps were observed on the TGA curve of **1**. The first weight loss of 7.37% (calcd. 7.28%) in the range 55–232°C is attributed to the removal of lattice water molecules and OH<sup>-</sup> groups. And the other two weight loss of 10.13% from 232 to 767°C and 6.55% from 767 to 900°C all come from the release of eight en ligands (calcd. 15.28%). For **2**, the first weight loss of 5.86% (calcd. 5.98%) in the range 55–240°C is attributed to the removal of six lattice water molecules and five OH<sup>-</sup> groups. And the other two weight loss of 12.27% from 225 to 767°C, and 7.17% from 767 to 900°C all come from the release of eight enMe ligands (calcd. 18.37%).
